# Supplementary material for: Collecting Paediatric Health-Related Quality of Life Data: Assessing the Feasibility and Acceptability of the Australian Paediatric Multi-Instrument Comparison (P-MIC) Study
Source: MDPI journal article supplement (doi:10.3390/children10101604), 2023-09-26
Supplement: s1 [file s1]

# SUPPLEMENTARY MATERIALS

## Table of Contents for Supplementary Materials

Supplementary Table S1. Time to complete the whole survey in seconds by sample recruitment pathway and sample type.

|   |                                                                                                                                      |
|---|--------------------------------------------------------------------------------------------------------------------------------------|
| 1 | Figure S1a. PedsQL self-reported difficulty by child age, report type, sample recruitment pathway, and online panel sample type.     |
| 2 | Figure S1b. EQ-5D-Y-3L self-reported difficulty by child age, report type, sample recruitment pathway, and online panel sample type. |
| 3 | Figure S1c. EQ-5D-Y-5L self-reported difficulty by child age, report type, sample recruitment pathway, and online panel sample type. |
| 4 | Figure S1d. CHU9D self-reported difficulty by child age, report type, sample recruitment pathway, and online panel sample type.      |
| 5 | Figure S1e. AQL-6D self-reported difficulty by child age, report type, and online panel sample type.                                 |
| 6 | Figure S1f. HUI2/3 self-reported difficulty by child age, report type, and online panel sample type.                                 |
| 7 | Figure S1g. PROMIS-25 self-reported difficulty by child age, report type, and online panel sample type.                              |
| 8 |                                                                                                                                      |

*Supplementary Table S1. Time to complete the whole survey in seconds by sample recruitment pathway, and sample type.*

| Quality variable                               | Median (IQR)               |                        |                            |                            |                            |                            |
|------------------------------------------------|----------------------------|------------------------|----------------------------|----------------------------|----------------------------|----------------------------|
|                                                | Survey                     |                        | Sample recruitment pathway |                            | Online panel sample type   |                            |
|                                                | Initial                    | Follow-up              | Hospital*                  | Online panel               | General population **      | Condition-specific ***     |
| <b>Time to complete whole survey (seconds)</b> |                            |                        |                            |                            |                            |                            |
| Short (lowest 10%)                             | 339.6 (299.8, 367.8)       | 168.0 (147.6, 183.0)   | 343.2 (312.7, 373.0)       | 339.4 (298.9, 367.3)       | 338.1 (295.4, 365.0)       | 340.6 (299.8, 369.1)       |
| Average (middle 80%)                           | 660.7 (534.0, 850.9)       | 329.4 (263.5, 428.5)   | 652.2 (534.0, 822.0)       | 661.5 (534.0, 852.9)       | 612.8 (499.0, 778.9)       | 685.2 (551.0, 873.5)       |
| Long (highest 10%)                             | 1,993.9 (1,584.9, 3,251.7) | 929.5 (772.7, 1,523.8) | 3,009.1 (1,946.9, 3,600)   | 1,859.4 (1,552.8, 2,670.7) | 1,905.9 (1,513.6, 2,849.3) | 1,845.9 (1,554.0, 2,656.5) |

\*Sample 1 (recruited via hospital), \*\* Sample 2 (general population sample recruited via online panel), \*\*\* Sample 3 (condition-specific samples recruited via online panel)

**Figure S1a. PedsQL self-reported difficulty by child age, report type, sample recruitment pathway, and online panel sample type.**

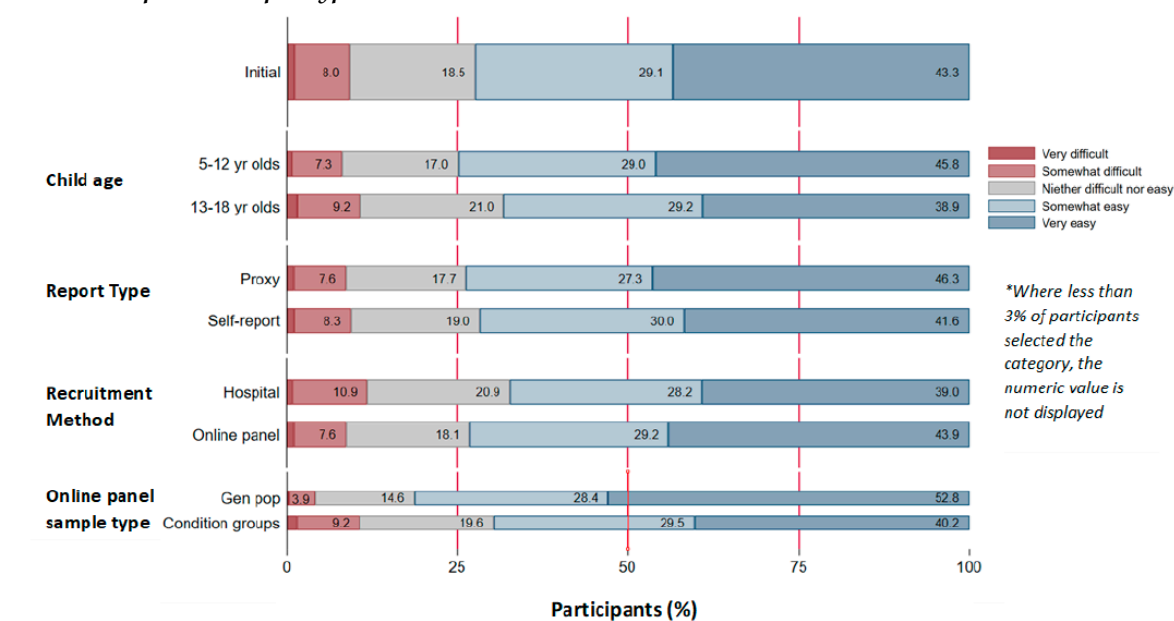

Abbreviations: Gen pop, general population; Initial, initial survey responses.

**Figure S1b. EQ-5D-Y-3L (including EQ VAS) self-reported difficulty by child age, report type, sample recruitment pathway, and online panel sample type.**

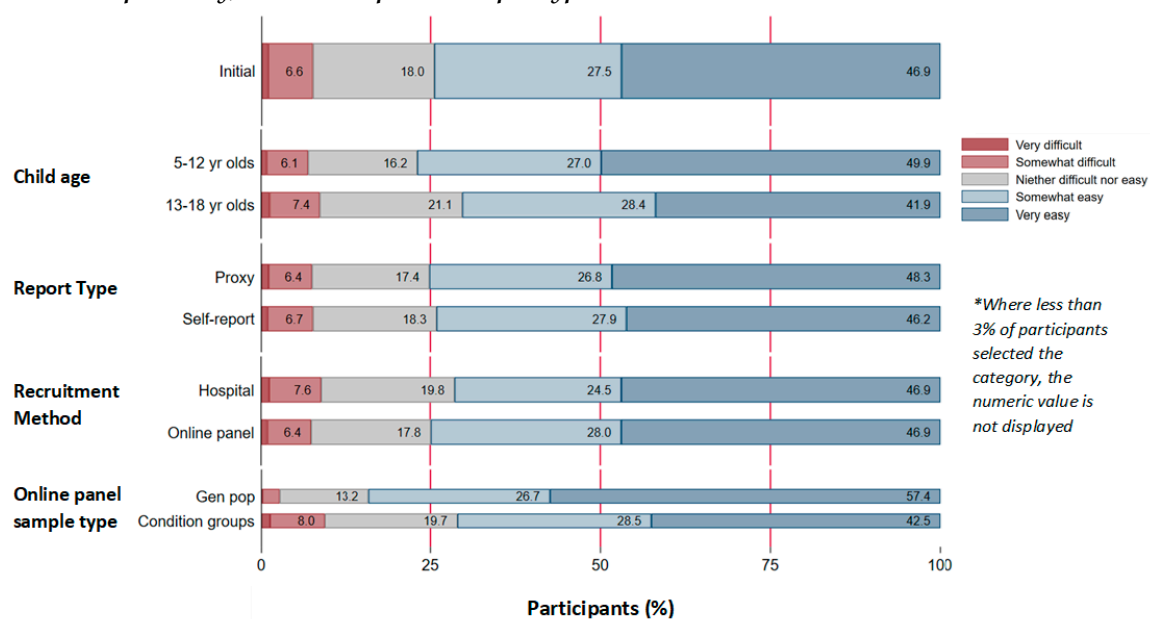

Abbreviations: Gen pop, general population; Initial, initial survey responses.

Figure S1c. EQ-5D-Y-5L (not including EQ VAS) self-reported difficulty by child age, report type, sample recruitment pathway, and online panel sample type.

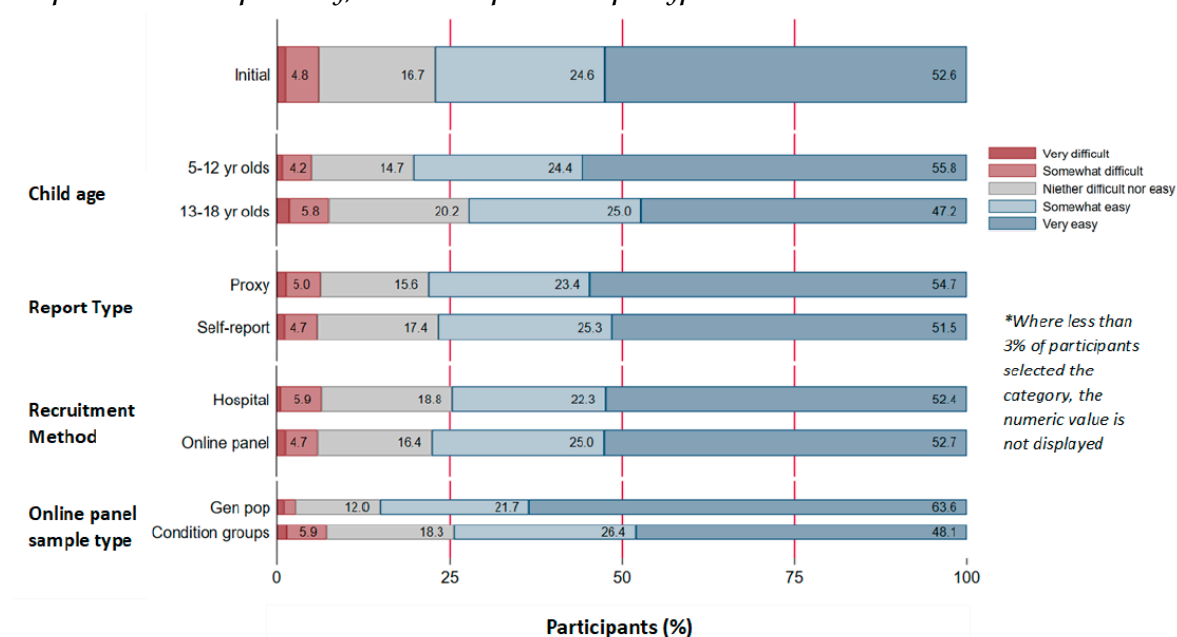

Abbreviations: Gen pop, general population; Initial, initial survey responses.

Figure S1d. CHU9D self-reported difficulty by child age, report type, sample recruitment pathway, and online panel sample type.

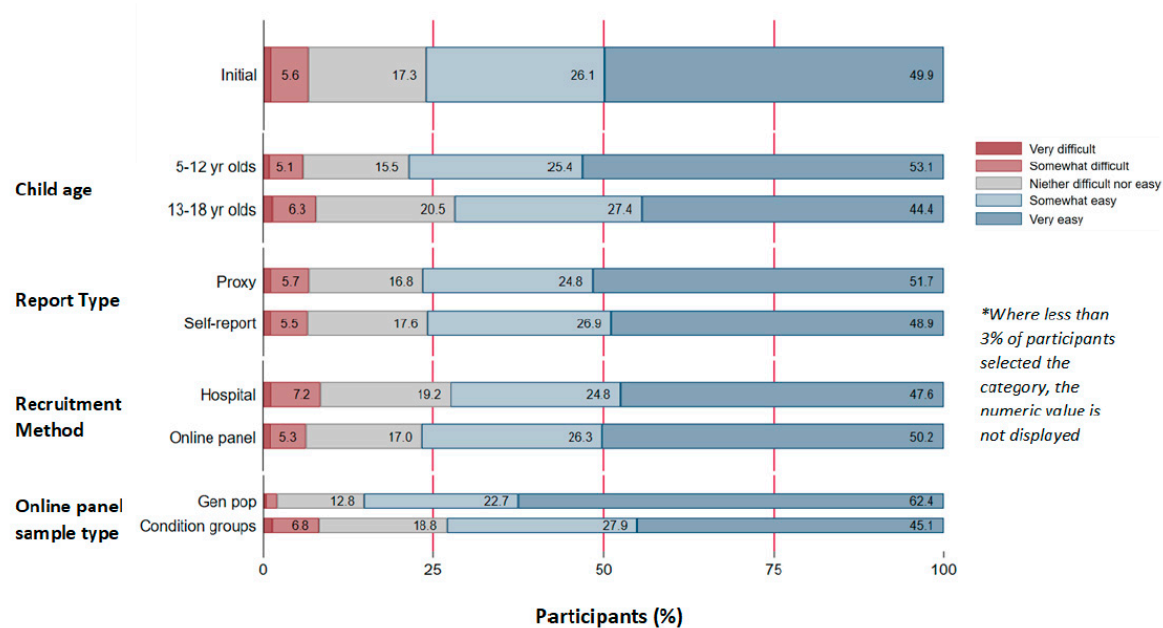

Abbreviations: Gen pop, general population; Initial, initial survey responses.

Figure S1e. AQoL-6D self-reported difficulty by child age, report type, and online panel sample type.

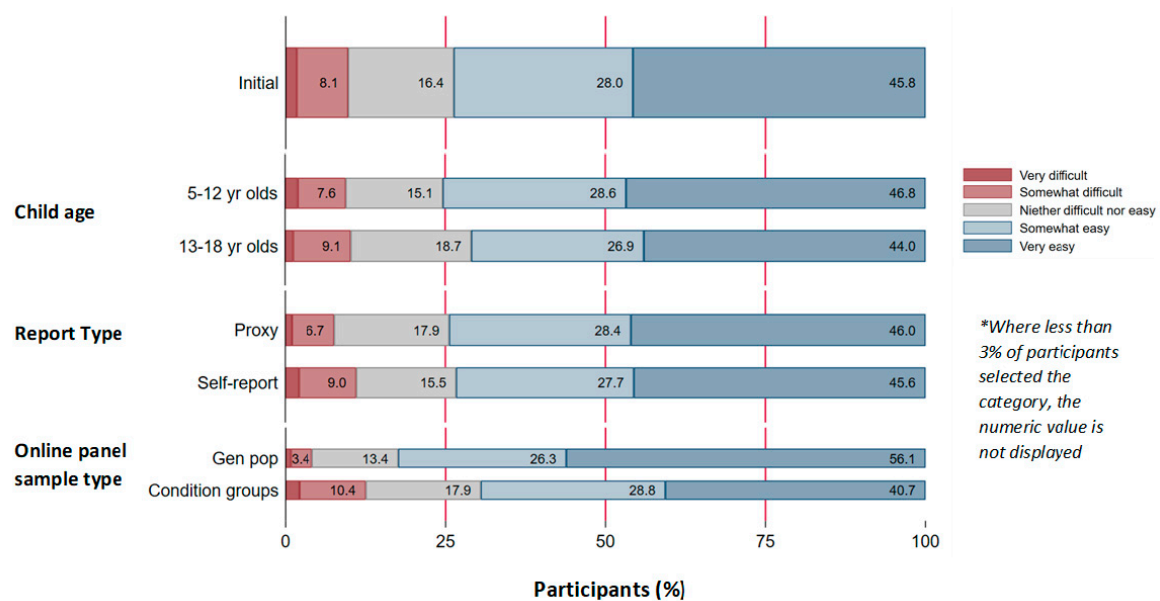

Abbreviations: Gen pop, general population; Initial, initial survey responses.

Figure S1f. HUI2/3 self-reported difficulty by child age, report type, and online panel sample type.

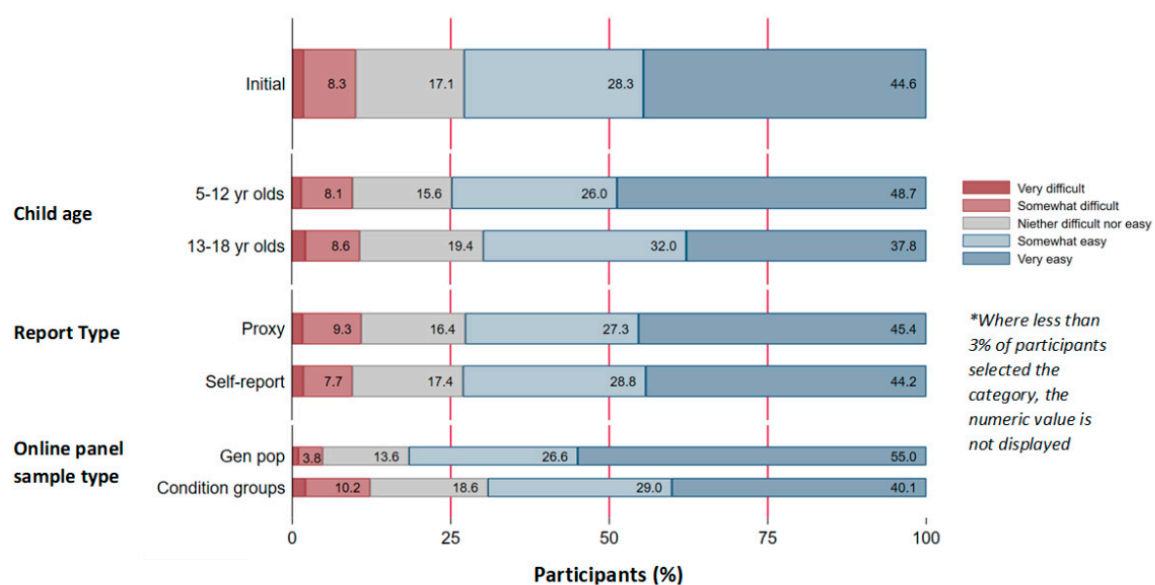

Abbreviations: Gen pop, general population; Initial, initial survey responses.

Figure S1g. PROMIS-25 self-reported difficulty by child age, report type, and online panel sample type.

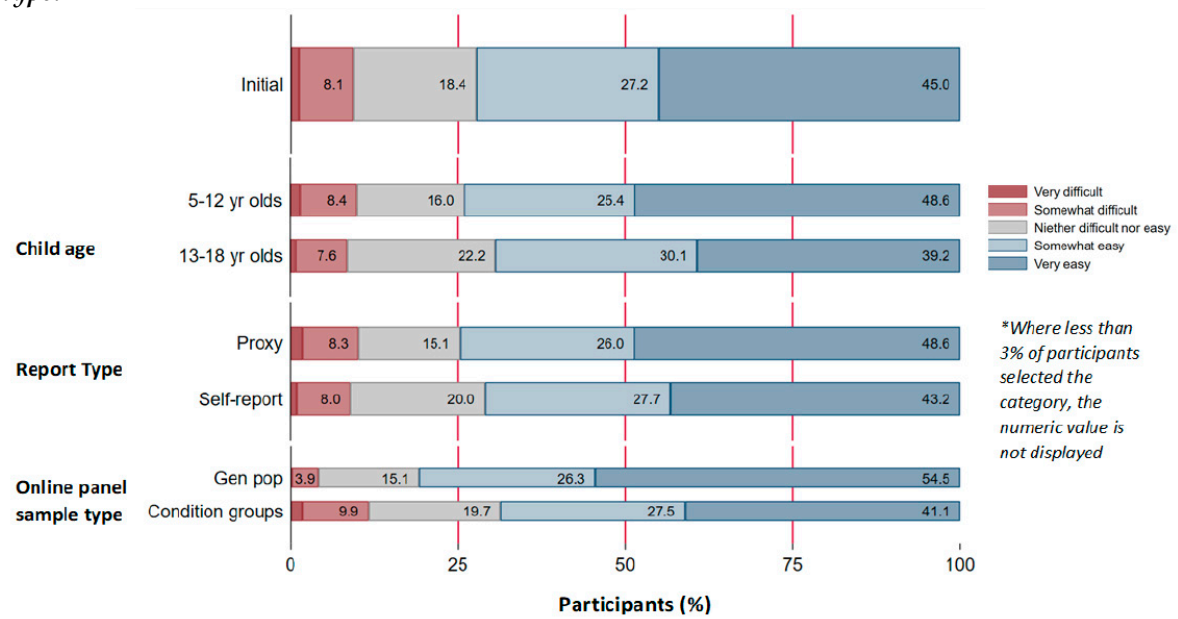

Abbreviations: Gen pop, general population; Initial, initial survey responses.
